# Supplementary material for: Associations between Multimorbidity Patterns and Subsequent Labor Market Marginalization among Refugees and Swedish-Born Young Adults—A Nationwide Registered-Based Cohort Study
Source: MDPI journal article supplement (doi:10.3390/jpm11121305), 2021-12-05
Supplement: s1 [file s1]

Supplement Table S1: List of ICD10 diagnostic groups in the multimorbidity network

| ICD10<br>diagnostic<br>groups* | Diagnoses Name                                                     |
|--------------------------------|--------------------------------------------------------------------|
| A00-A09                        | Intestinal infectious disease                                      |
| A30-A49                        | Other bacterial diseases                                           |
| A50-A64                        | Infections with a predominantly sexual model of transmission       |
| B00-B09                        | Viral infections characterized by skin and mucous membrane         |
| B15-B19                        | Viral hepatitis                                                    |
| B25-B34                        | Other viral diseases                                               |
| B35-B49                        | Mycoses                                                            |
| B85-B89                        | Pediculosis, acariasis and other infestations                      |
| B95-B98                        | Bacterial, viral and other infectious agents                       |
| C00-C97                        | Malignant neoplasms                                                |
| D00-D09                        | In situ neoplasms                                                  |
| D10-D36                        | Benign neoplasms                                                   |
| D37-D48                        | Neoplasms of uncertain or unknown behavior                         |
| D50-D53                        | Nutritional anemias                                                |
| D60-D64                        | Aplastic and other anemias                                         |
| D65-D69                        | Coagulation defects, purpura and other hemorrhagic condition       |
| E00-E07                        | Disorder of thyroid gland                                          |
| E10-E14                        | Diabetes mellitus                                                  |
| E20-E35                        | Disorders of other endocrine glands                                |
| E65-E68                        | Obesity and other hyperalimentation                                |
| E70-E90                        | Metabolic disorders                                                |
| F00-F09                        | Organic, including symptomatic, mental disorders                   |
| F10-F19                        | Mental and behavioral disorders due to psychoactive substance uses |

|         |                                                                                              |
|---------|----------------------------------------------------------------------------------------------|
| F20-F29 | Schizophrenia, schizotypal and delusional disorders                                          |
| F30-F39 | Mood [affective] disorders                                                                   |
| F40-F48 | Neurotic, stress-related and somatoform disorders                                            |
| F50-F59 | Behavioral syndromes associated with physiological disturbances and physical factors         |
| F60-F69 | Disorders of adult personality and behavior                                                  |
| F70-F79 | Mental retardation                                                                           |
| F80-F89 | Disorders of psychological development                                                       |
| F90-F98 | Behavioral and emotional disorders with onset usually occurring in childhood and adolescence |
| F99-F99 | Unspecified mental disorder                                                                  |
| G40-G47 | Episodic and paroxysmal disorders                                                            |
| G50-G59 | Nerve, nerve root and plexus disorders                                                       |
| G90-G99 | Other disorders of the nervous system                                                        |
| H00-H06 | Disorders of eyelid, lacrimal system and orbit                                               |
| H10-H13 | Disorders of conjunctiva                                                                     |
| H15-H22 | Disorders of sclera, cornea, iris and ciliary body                                           |
| H30-H36 | Disorders of choroid and retina                                                              |
| H49-H52 | Disorders of ocular muscles, binocular movement, accommodation and refraction                |
| H53-H54 | Visual disturbances and blindness                                                            |
| H60-H62 | Diseases of external ear                                                                     |
| H65-H75 | Diseases of middle ear and mastoid                                                           |
| H80-H83 | Diseases of inner ear                                                                        |
| H90-H95 | Other disorders of ear                                                                       |
| I10-I15 | Hypertensive diseases                                                                        |
| I30-I52 | Other forms of heart disease                                                                 |
| I80-I89 | Diseases of veins, lymphatic vessels and lymph nodes, not elsewhere classified               |
| J00-J06 | Acute upper respiratory infections                                                           |
| J09-J18 | Influenza and pneumonia                                                                      |

|         |                                                                     |
|---------|---------------------------------------------------------------------|
| J20-J22 | Other acute lower respiratory infections                            |
| J30-J39 | Other disease of upper respiratory tract                            |
| J40-J47 | Chronic lower respiratory disease                                   |
| K00-K14 | Diseases of oral cavity, salivary glands and jaws                   |
| K20-K31 | Diseases of esophagus, stomach and duodenum                         |
| K35-K38 | Diseases of appendix                                                |
| K40-K46 | Hernia                                                              |
| K50-K52 | Noninfective enteritis and colitis                                  |
| K55-K64 | Other diseases of intestines                                        |
| K80-K87 | Disorders of gallbladder, biliary tract and pancreas                |
| K90-K93 | Other diseases of the digestive system                              |
| L00-L08 | Infections of the skin and subcutaneous tissue                      |
| L20-L30 | Dermatitis and eczema                                               |
| L40-L45 | Papulosquamous disorders                                            |
| L50-L54 | Urticaria and erythema                                              |
| L60-L75 | Disorders of skin appendages                                        |
| L80-L99 | Other disorders of the skin and subcutaneous tissue                 |
| M00-M25 | Arthropathies                                                       |
| M30-M36 | Systemic connective tissue disorders                                |
| M40-M54 | Dorsopathies                                                        |
| M60-M79 | Soft tissue disorders                                               |
| M80-M94 | Osteopathies and chondropathies                                     |
| M95-M99 | Other disorders of the musculoskeletal system and connective tissue |
| N00-N08 | Glomerular diseases                                                 |
| N10-N16 | Renal tubulo-interstitial diseases                                  |
| N17-N19 | Renal failure                                                       |
| N20-N23 | Urolithiasis                                                        |
| N30-N39 | Other diseases of urinary system                                    |

|         |                                                                                            |
|---------|--------------------------------------------------------------------------------------------|
| N40-N51 | Diseases of male genital organs                                                            |
| N60-N64 | Disorders of breast                                                                        |
| N70-N77 | Inflammatory diseases of female pelvic organs                                              |
| N80-N98 | Noninflammatory disorders of female genital tract                                          |
| O00-O08 | Pregnancy with abortive outcome                                                            |
| O10-O16 | Oedema, proteinuria and hypertensive disorders in pregnancy, childbirth and the puerperium |
| O20-O29 | Other maternal disorders predominantly related to pregnancy                                |
| O30-O48 | Maternal care related to the fetus and amniotic cavity and possible delivery problems      |
| O60-O75 | Complications of labor and delivery                                                        |
| O80-O84 | Delivery                                                                                   |
| O85-O92 | Complications predominantly related to the puerperium                                      |
| O94-O99 | Other obstetric conditions, not elsewhere classified                                       |
| S00-S09 | Injuries to the head                                                                       |
| S10-S19 | Injuries to the neck                                                                       |
| S20-S29 | Injuries to the thorax                                                                     |
| S30-S39 | Injuries to the abdomen, lower back, lumbar spine and pelvis                               |
| S40-S49 | Injuries to the shoulder and upper arm                                                     |
| S50-S59 | Injuries to the elbow and forearm                                                          |
| S60-S69 | Injuries to the wrist and hand                                                             |
| S70-S79 | Injuries to the hip and thigh                                                              |
| S80-S89 | Injuries to the knee and lower leg                                                         |
| S90-S99 | Injuries to the ankle and foot                                                             |
| T00-T07 | Injuries involving multiple body regions                                                   |
| T08-T14 | Injuries to unspecified part of trunk, limb or body region                                 |
| T15-T19 | Effects of foreign body entering through natural orifice                                   |
| T36-T50 | Poisoning by drugs, medicaments and biological substances                                  |
| T51-T65 | Toxic effects of substances chiefly nonmedicinal as to source                              |
| T66-T78 | Other and unspecified effects of external causes                                           |

|         |                                                                                 |
|---------|---------------------------------------------------------------------------------|
| T80-T88 | Complications of surgical and medical care, not elsewhere classified            |
| T90-T98 | Sequelae of injuries, of poisoning and of other consequences of external causes |
| V01-X59 | Accidents                                                                       |
| X60-X84 | Intentional self-harm                                                           |
| X85-Y09 | Assault                                                                         |
| Y10-Y34 | Event of undetermined intent                                                    |
| Y40-Y84 | Complications of medical and surgical care                                      |
| Y85-Y89 | Sequelae of external causes of morbidity and mortality                          |

\*ICD10 diagnostic group indicates the International Classification of Diseases Tenth Edition provided by WHO

Supplement Table S2: The diagnoses classes with the highest relative risk of disability pension among 249,245 young adults in Sweden.

| Diagnosis Name                                                                            | ICD10<br>diagnostic<br>groups* | n<br>refugees | n<br>Swedish<br>-born | n<br>individuals | n<br>disability<br>pension<br>in<br>refugees | n<br>disability<br>pension<br>in<br>Swedish-<br>born | Relative<br>risk in<br>disability<br>pension<br>* |
|-------------------------------------------------------------------------------------------|--------------------------------|---------------|-----------------------|------------------|----------------------------------------------|------------------------------------------------------|---------------------------------------------------|
| <b>Disorders of conjunctiva</b>                                                           | H10-H13                        | 263           | 1202                  | 1465             | <10                                          | 12                                                   | 2.67                                              |
| <b>Diabetes mellitus</b>                                                                  | E10-E14                        | 128           | 1636                  | 1764             | <10                                          | 32                                                   | 2.40                                              |
| <b>Viral infections characterized by skin and<br/>mucous membrane lesions</b>             | B00-B09                        | 136           | 751                   | 887              | <10                                          | 10                                                   | 2.21                                              |
| <b>Organic, including symptomatic, mental<br/>disorders</b>                               | F00-F09                        | 13            | 92                    | 105              | <10                                          | 20                                                   | 1.77                                              |
| <b>Diseases of veins, lymphatic vessels and lymph<br/>nodes, not elsewhere classified</b> | I80-I89                        | 301           | 1186                  | 1487             | 13                                           | 29                                                   | 1.77                                              |
| <b>Influenza and pneumonia</b>                                                            | J09-J18                        | 354           | 998                   | 1352             | 13                                           | 21                                                   | 1.75                                              |

|                                                                                        |         |     |      |      |     |     |      |
|----------------------------------------------------------------------------------------|---------|-----|------|------|-----|-----|------|
| <b>Infections with a predominantly sexual mode of transmission</b>                     | A50-A64 | 692 | 5030 | 5722 | 10  | 42  | 1.73 |
| <b>Sequelae of injuries, of poisoning and of other consequences of external causes</b> | T90-T98 | 304 | 1353 | 1657 | 11  | 32  | 1.53 |
| <b>Papulosquamous disorders</b>                                                        | L40-L45 | 138 | 826  | 964  | <10 | <10 | 1.50 |
| <b>Mental retardation</b>                                                              | F70-F79 | 41  | 124  | 165  | 19  | 39  | 1.47 |
| <b>Toxic effects of substances chiefly nonmedicinal as to source</b>                   | T51-T65 | 85  | 563  | 648  | <10 | 18  | 1.47 |
| <b>Disorders of psychological development</b>                                          | F80-F89 | 42  | 634  | 676  | 16  | 165 | 1.46 |
| <b>Injuries to the thorax</b>                                                          | S20-S29 | 338 | 1389 | 1727 | 11  | 31  | 1.46 |
| <b>Disorders of choroid and retina</b>                                                 | H30-H36 | 79  | 300  | 379  | <10 | 11  | 1.38 |
| <b>Disorders of gallbladder, biliary tract and pancreas</b>                            | K80-K87 | 167 | 783  | 950  | <10 | 21  | 1.34 |
| <b>Diseases of male genital organs</b>                                                 | N40-N51 | 381 | 2251 | 2632 | <10 | 31  | 1.33 |
| <b>Osteopathies and chondropathies</b>                                                 | M80-M94 | 179 | 888  | 1067 | <10 | 15  | 1.32 |
| <b>Diseases of external ear</b>                                                        | H60-H62 | 189 | 994  | 1183 | <10 | 20  | 1.31 |
| <b>Effects of foreign body entering through natural orifice</b>                        | T15-T19 | 176 | 1387 | 1563 | <10 | 12  | 1.31 |
| <b>Other forms of heart disease</b>                                                    | I30-I52 | 170 | 1081 | 1251 | <10 | 30  | 1.27 |

\*ICD10 diagnostic group indicates the International Classification of Diseases Tenth Edition provided by WHO

\* Relative risk (RRs) in disability pension indicates the risk of obtaining disability pension in refugee youth, compared to the matched Swedish-born in each diagnostic group.

Supplement Table S3: The diagnoses class with the highest relative risk of unemployment among 249,245 young adults in Sweden.

| <b>Diagnosis Name</b>                                                                      | ICD10<br>diagnostic<br>groups* | n<br>refugees | n<br>Swedish<br>-born | n<br>individuals | n<br>unemployment<br>in refugees | n<br>unemployment<br>in Swedish-<br>born | Relative risk in<br>unemployment* |
|--------------------------------------------------------------------------------------------|--------------------------------|---------------|-----------------------|------------------|----------------------------------|------------------------------------------|-----------------------------------|
| <b>Glomerular diseases</b>                                                                 | N00-N08                        | 35            | 200                   | 235              | 10                               | <10                                      | 8.16                              |
| <b>Hypertensive diseases</b>                                                               | I10-I15                        | 39            | 221                   | 260              | 12                               | 10                                       | 6.80                              |
| <b>Sequelae of external causes of<br/>morbidity and mortality</b>                          | Y85-Y89                        | 237           | 1139                  | 1376             | 63                               | 48                                       | 6.31                              |
| <b>Diseases of appendix</b>                                                                | K35-K38                        | 241           | 1443                  | 1684             | 52                               | 53                                       | 5.87                              |
| <b>Nutritional anemias</b>                                                                 | D50-D53                        | 199           | 291                   | 490              | 39                               | 10                                       | 5.70                              |
| <b>Mycoses</b>                                                                             | B35-B49                        | 574           | 1953                  | 2527             | 115                              | 71                                       | 5.51                              |
| <b>Other forms of heart disease</b>                                                        | I30-I52                        | 170           | 1081                  | 1251             | 38                               | 45                                       | 5.37                              |
| <b>Other viral diseases</b>                                                                | B25-B34                        | 381           | 1521                  | 1902             | 79                               | 61                                       | 5.17                              |
| <b>Sequelae of injuries. of poisoning and of<br/>other consequences of external causes</b> | T90-T98                        | 304           | 1353                  | 1657             | 67                               | 59                                       | 5.05                              |
| <b>Effects of foreign body entering<br/>through natural orifice</b>                        | T15-T19                        | 176           | 1387                  | 1563             | 40                               | 63                                       | 5.00                              |
| <b>Diseases of inner ear</b>                                                               | H80-H83                        | 79            | 369                   | 448              | 17                               | 16                                       | 4.96                              |
| <b>Nerve. nerve root and plexus disorders</b>                                              | G50-G59                        | 159           | 722                   | 881              | 38                               | 35                                       | 4.93                              |

|                                                 |         |      |      |      |     |     |      |
|-------------------------------------------------|---------|------|------|------|-----|-----|------|
| <b>Noninfective enteritis and colitis</b>       | K50-K52 | 215  | 1603 | 1818 | 44  | 67  | 4.90 |
| <b>Injuries to the hip and thigh</b>            | S70-S79 | 149  | 803  | 952  | 38  | 42  | 4.88 |
| <b>Other disease of upper respiratory tract</b> | J30-J39 | 1317 | 6261 | 7578 | 220 | 215 | 4.86 |
| <b>Chronic lower respiratory disease</b>        | J40-J47 | 274  | 2680 | 2954 | 63  | 127 | 4.85 |
| <b>Influenza and pneumonia</b>                  | J09-J18 | 354  | 998  | 1352 | 70  | 41  | 4.81 |
| <b>Disorder of thyroid gland</b>                | E00-E07 | 223  | 809  | 1032 | 51  | 39  | 4.74 |
| <b>Acute upper respiratory infections</b>       | J00-J06 | 655  | 3325 | 3980 | 125 | 139 | 4.57 |
| <b>In situ neoplasms</b>                        | D00-D09 | 20   | 411  | 431  | <10 | 23  | 4.47 |

\*ICD10 diagnostic group indicates the International Classification of Diseases Tenth Edition provided by WHO

\*Relative risk in long term unemployment indicates the risk of obtaining long term unemployment in refugee youth, compared to the matched Swedish-born in each diagnostic group.
